# Supplementary material
Source: publisher figshare collection journal article supplement (https://acs.figshare.com/ndownloader/files/4586380)

## Supporting Information

### **Titanocene(III) Chloride-Mediated Reductions of Oxazines, Hydroxamic Acids, and N-Hydroxy Carbamates**

Cara Cesario, Lawrence P. Tardibono, Jr. and Marvin J. Miller\*

*Department of Chemistry and Biochemistry, University of Notre Dame, 251 Nieuwland Science Hall,*

*Notre Dame, Indiana 46545*

*mmiller1@nd.edu*

#### Table of Contents

|                                                                                      |     |
|--------------------------------------------------------------------------------------|-----|
| General Experimental .....                                                           | S2  |
| Proposed Catalytic Cycles for Cp <sub>2</sub> TiCl-Mediated N-O Bond Reductions..... | S2  |
| Purification of <b>6d</b> .....                                                      | S3  |
| Preparation of <b>9b</b> .....                                                       | S3  |
| Purification of <b>10b</b> .....                                                     | S4  |
| Purification of <b>12</b> .....                                                      | S4  |
| <sup>1</sup> H NMR spectrum of <b>6a</b> .....                                       | S5  |
| <sup>13</sup> C NMR spectrum of <b>6a</b> .....                                      | S6  |
| <sup>1</sup> H NMR spectrum of <b>6b</b> .....                                       | S7  |
| <sup>13</sup> C NMR spectrum of <b>6b</b> .....                                      | S8  |
| <sup>1</sup> H NMR spectrum of <b>6c</b> .....                                       | S9  |
| <sup>13</sup> C NMR spectrum of <b>6c</b> .....                                      | S10 |
| <sup>1</sup> H NMR spectrum of <b>6f</b> .....                                       | S11 |
| <sup>13</sup> C NMR spectrum of <b>6f</b> .....                                      | S12 |
| <sup>1</sup> H NMR spectrum of <b>6g</b> .....                                       | S13 |
| <sup>13</sup> C NMR spectrum of <b>6g</b> .....                                      | S14 |
| <sup>1</sup> H NMR spectrum of <b>9b</b> .....                                       | S15 |
| <sup>13</sup> C NMR spectrum of <b>9b</b> .....                                      | S16 |
| <sup>1</sup> H NMR spectrum of <b>10a</b> .....                                      | S17 |
| <sup>13</sup> C NMR spectrum of <b>10a</b> .....                                     | S18 |

**General Experimental:** Commercially available reagents and anhydrous solvents were used without further purification unless otherwise specified. Tetrahydrofuran (THF) was distilled from sodium and benzophenone and was thoroughly degassed (dry Argon) with a gas dispersion tube for 45 min prior to use. Diphenylphosphino-polystyrene (PS-PPh<sub>3</sub>) was purchased from Biotage. Reactions were monitored by thin-layer chromatography (TLC) on silica gel 60 F254 (0.2 mm) precoated aluminum foil and visualized with an ethanolic solution of KMnO<sub>4</sub>. Flash chromatography was performed with silica gel 60 (230–400 mesh). <sup>1</sup>H NMR and <sup>13</sup>C NMR spectra were recorded at ambient temperature with the residual solvent peaks as internal standards. The line positions of multiplets are given in ppm (δ) and the coupling constants (*J*) are given as absolute values in Hertz. Infrared spectra were recorded by a FT-IR spectrometer and reported as cm<sup>-1</sup>. All melting points were recorded uncorrected. High-resolution mass spectra (HRMS) data were obtained as specified.

**Proposed Catalytic Cycles for Cp<sub>2</sub>TiCl-Mediated N-O Bond Reductions:**

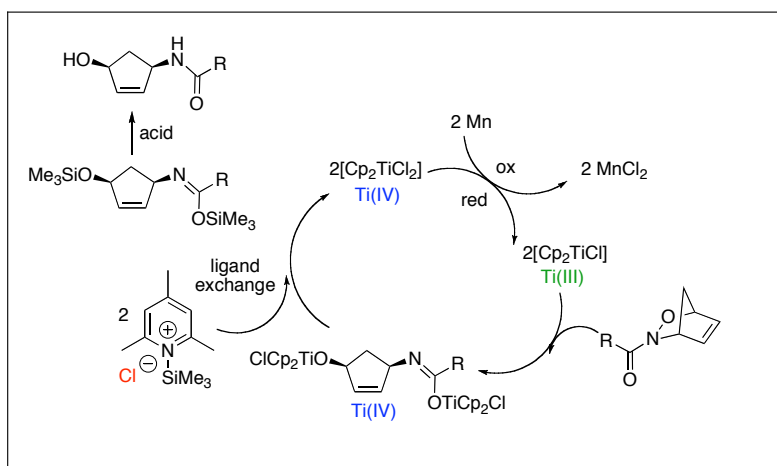

Adapted from: Fürtstner, A. et al. *J. Am. Chem. Soc.* **1995**, 117, 4468

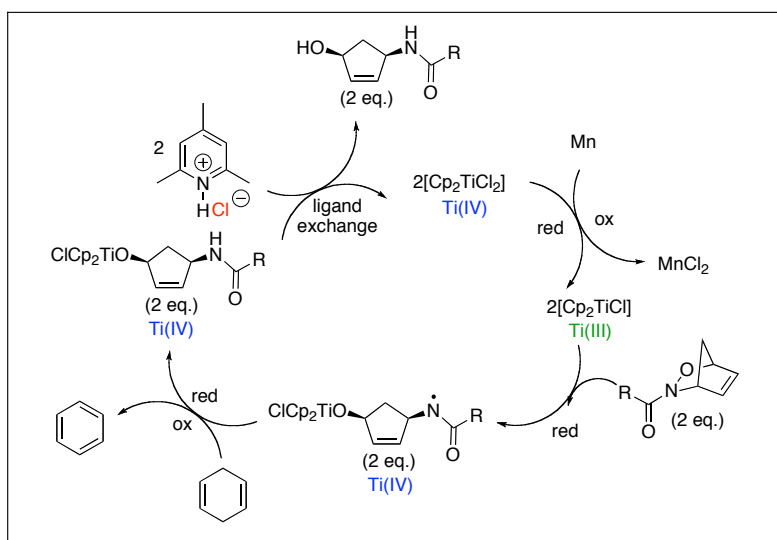

Adapted from: Gansäuer, A. et al. *J. Am. Chem. Soc.* **1998**, 120, 12849

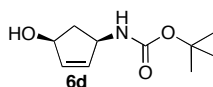

(±)**cis-Z-tert-Butyl-4-hydroxycyclopent-2-enylcarbamate 6d**. Prepared according to General Procedure A and B. Crude material was purified by silica gel chromatography (30% EtOAc/hexanes to 50% EtOAc/hexanes) to afford product as white solids (79% and 71%, respectively). Spectral data is consistent with previously reported data.<sup>1</sup>

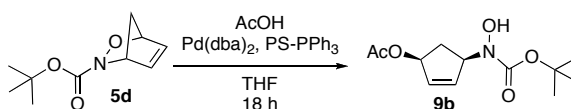

(±)**cis-Z-4-(tert-Butoxycarbonyl(hydroxy)amino)cyclopent-2-enyl acetate 9b**. A clean flame-dried 25 mL round bottom flask equipped with a stir bar was evacuated and purged with Ar. A THF solution (5 mL) of Boc cycloadduct **5d** (100 mg, 0.51 mmol), Pd(dba)<sub>2</sub> (29 mg, 0.05 mmol), and diphenylphosphino-polystyrene (PS-PPh<sub>3</sub>) (88 mg, 0.15 mmol) was charged with acetic acid (0.145 mL, 2.54 mmol) and stirred at rt under Ar for 18 h. The reaction mixture was filtered through a Whatman Glass Microfiber Filter (Type GF/F) and the palladium/resin mixture was washed with CH<sub>2</sub>Cl<sub>2</sub>. The filtrate was added sat. NaHCO<sub>3</sub> (3 mL) and the CH<sub>2</sub>Cl<sub>2</sub> layer was removed. The aqueous layer was extracted with CH<sub>2</sub>Cl<sub>2</sub> (3 × 5 mL). The combined organics were washed with brine (15 mL), dried over Na<sub>2</sub>SO<sub>4</sub>, filtered and concentrated to an oil. The resultant residue was purified by silica gel chromatography (2% MeOH/CH<sub>2</sub>Cl<sub>2</sub>) to afford **9b** as a tan oil (83 mg, 64%). <sup>1</sup>H NMR (600 MHz, MeOH-*d*<sub>4</sub>) δ 1.49 (s, 9H), 1.86 (ddd, 1H, *J*= 13.8 Hz, 5.9 Hz, 5.3 Hz), 2.03 (s, 3H), 2.6 (ddd, 1H, *J*= 13.8 Hz, 7.9 Hz, 7.8 Hz), 5.09 (dddd, 1H, *J*= 8.0 Hz, 6.9 Hz, 1.9 Hz, 1.9 Hz, 1.9 Hz), 5.50–5.53 (m, 2H), 5.92 (ddd, 1H, *J*= 5.7 Hz, 2.0 Hz, 1.2 Hz), 5.94 (ddd, 1H, *J*= 5.6 Hz, 2.0 Hz, 2.0 Hz); <sup>13</sup>C NMR (150 MHz, MeOH-*d*<sub>4</sub>) δ 21.1, 28.7, 34.3, 64.1, 79.1, 82.6, 133.6, 136.3, 158.3, 172.8; IR (thin film, cm<sup>-1</sup>) 3390, 2978, 2140, 1732, 1694, 1479; HRMS (FAB) *m/z* (M+H): calcd for C<sub>12</sub>H<sub>19</sub>NO<sub>5</sub><sup>+</sup>, 258.1341; found, 258.1356.

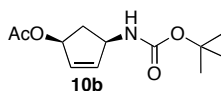

**(±)-cis-Z-4-(tert-Butoxycarbonylamino)cyclopent-2-enyl acetate 10b.** Prepared according to General Procedure A and C. Crude material was purified by silica gel chromatography (50% EtOAc/hexanes to 70% EtOAc/hexanes) to afford product as white solids (73% and 44%, respectively). Spectral data is consistent with previously reported data.<sup>2</sup>

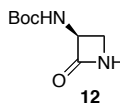

**(S)-tert-Butyl 2-oxoazetidin-3-ylcarbamate 12.** Prepared according to General Procedure A. Crude material was purified by silica gel chromatography (75% EtOAc/hexanes) to afford product as white solids (80%). Spectral data is consistent with previously reported data.<sup>3</sup>

---

<sup>1</sup> Zhang, D.; Süling, C.; Miller, M. J. *J. Org. Chem.* **1998**, *63*, 885–888.

<sup>2</sup> Zhang, D.; Miller, M. J. *J. Org. Chem.* **1998**, *63*, 755–759.

<sup>3</sup> Mattingly, P. G.; Miller, M. J. *J. Org. Chem.* **1980**, *45*, 410–415.

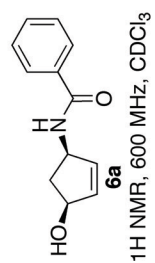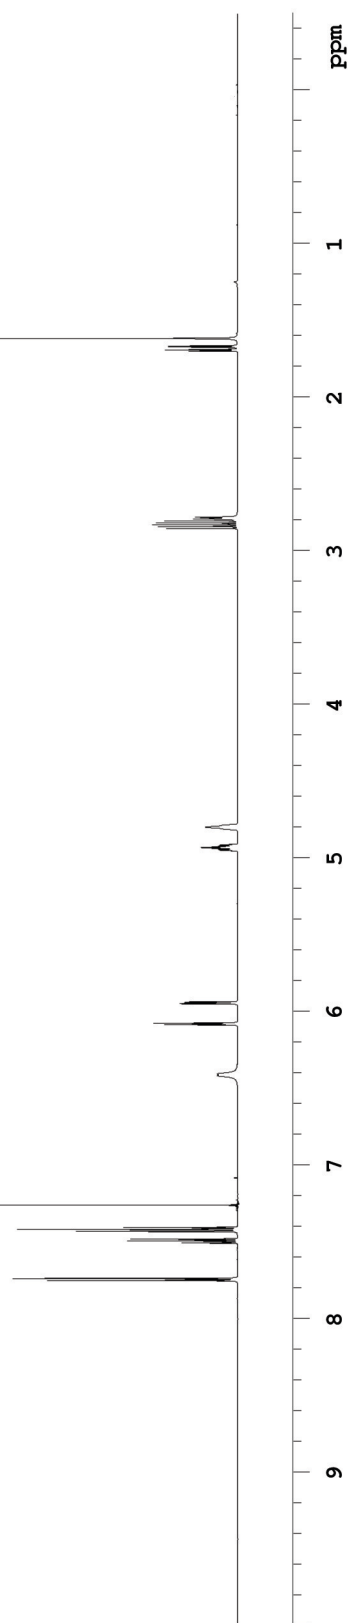

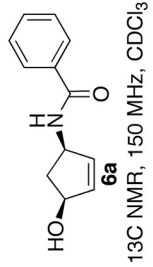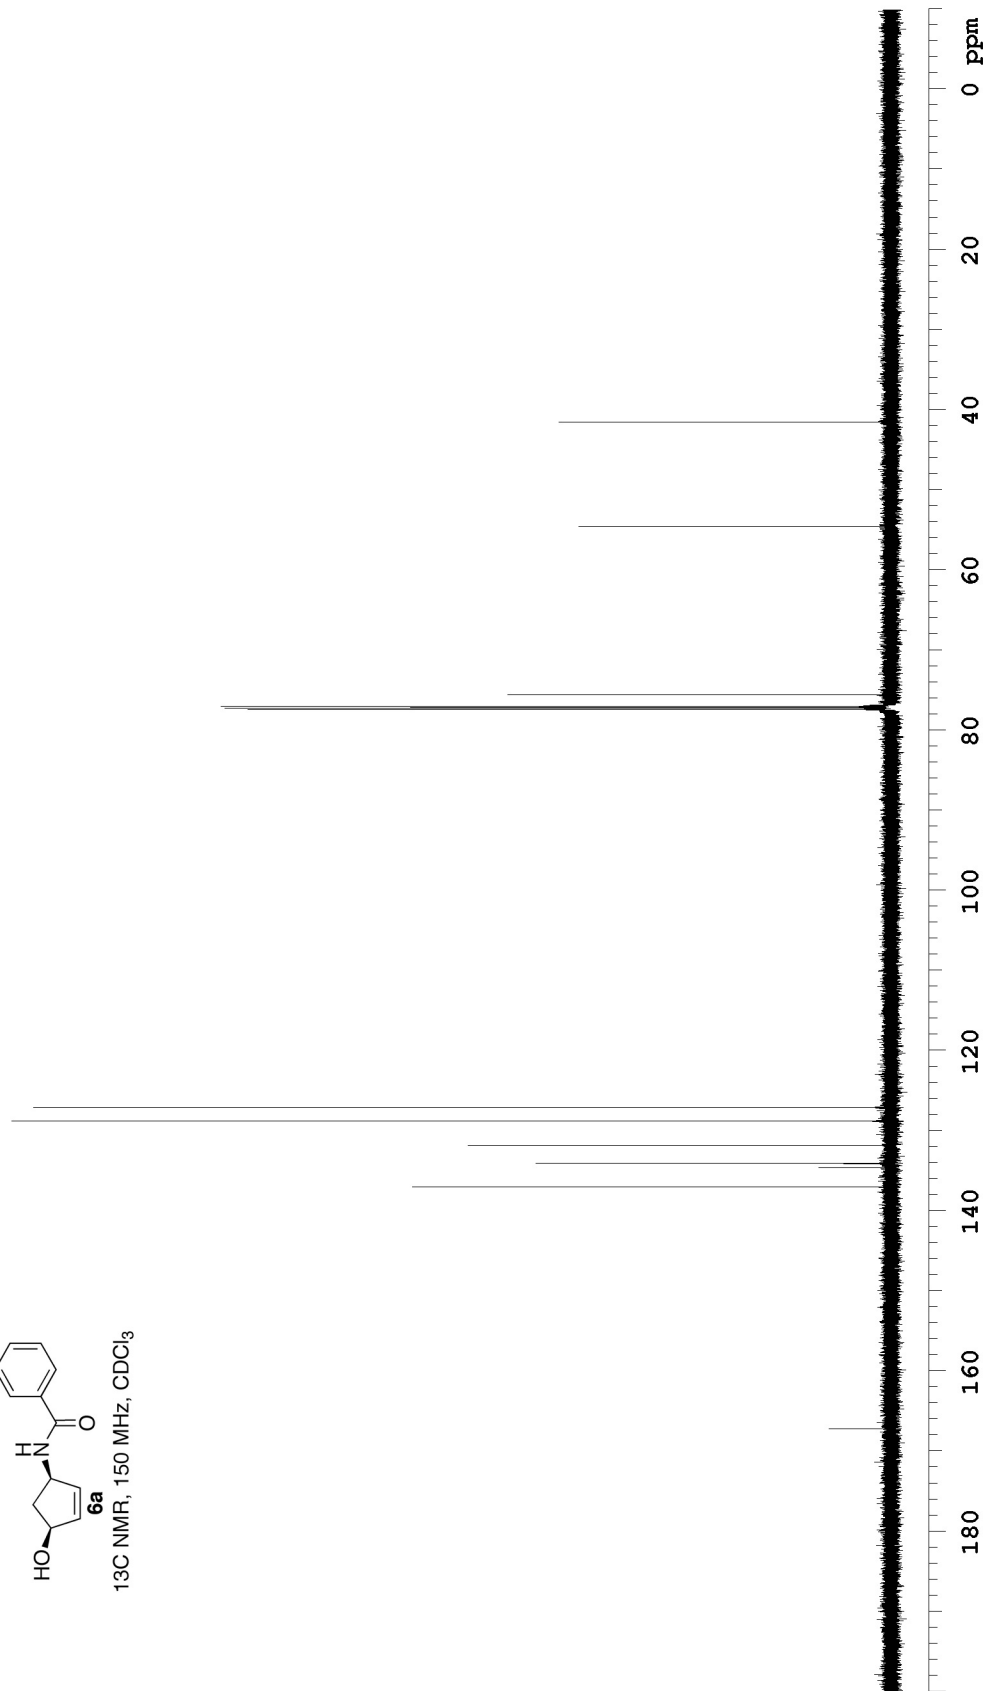

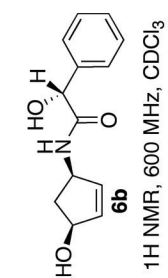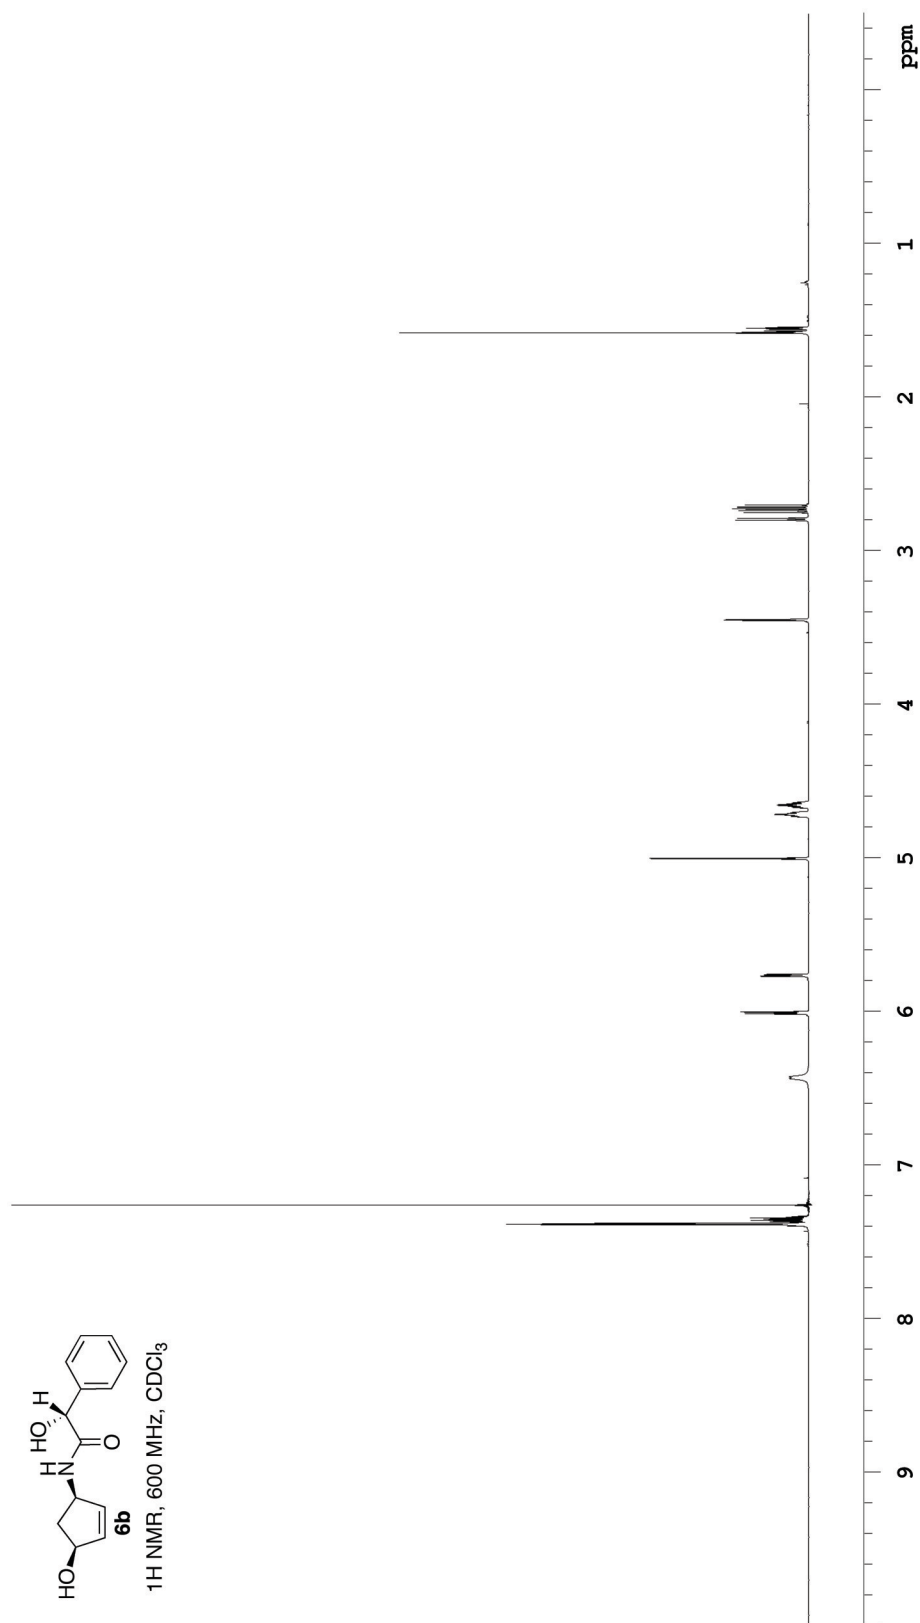

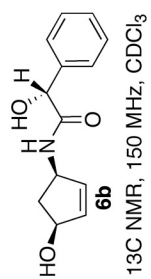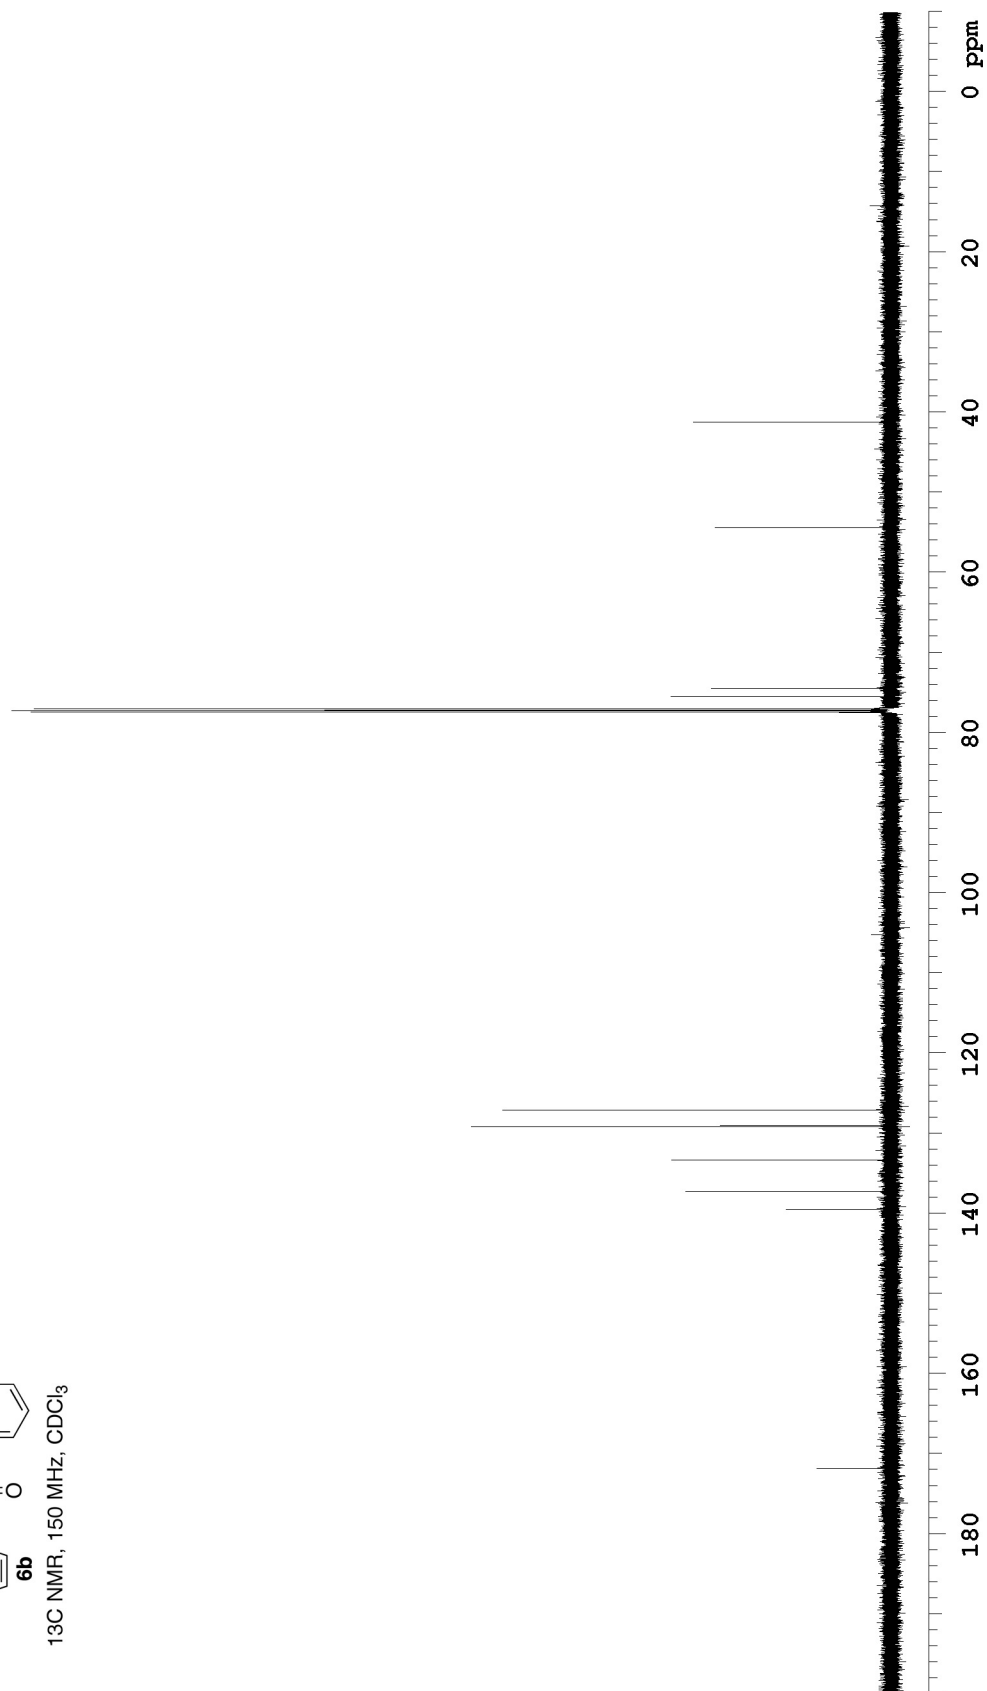



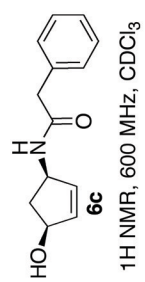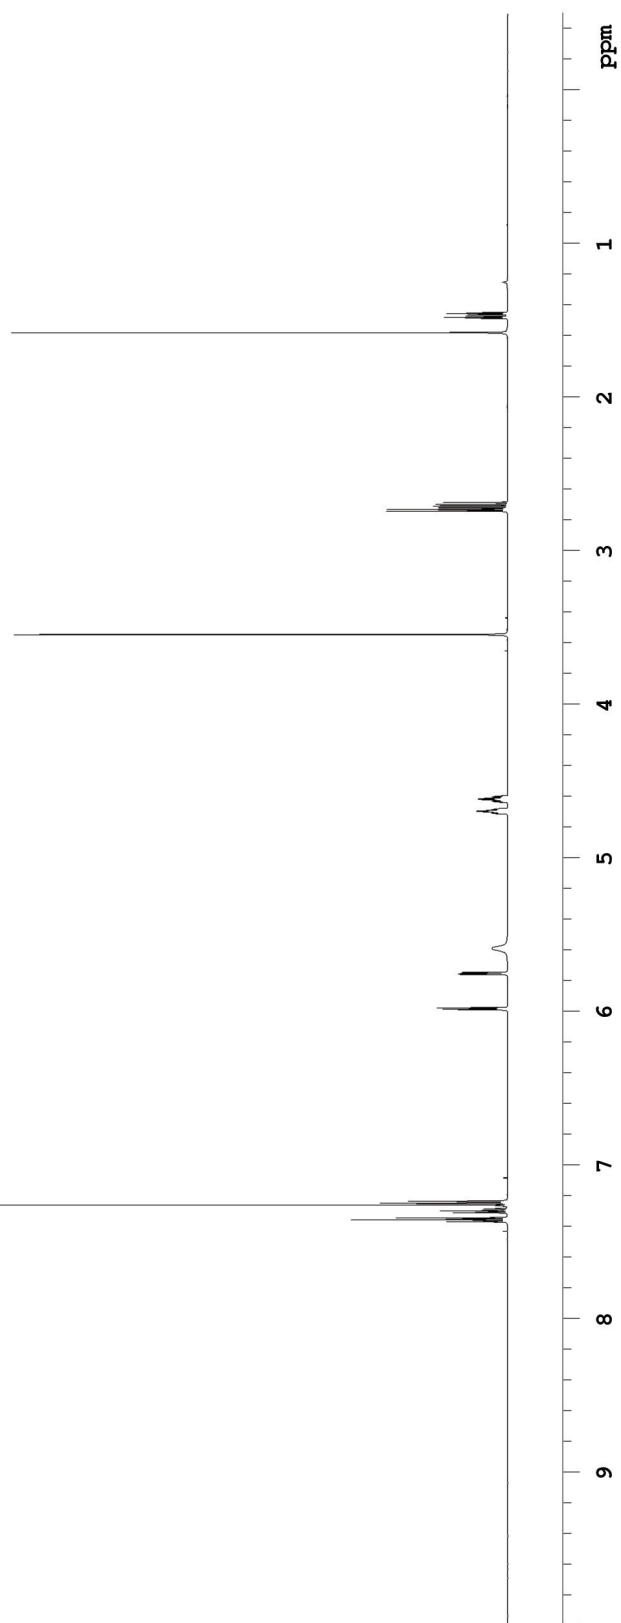

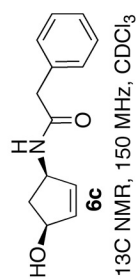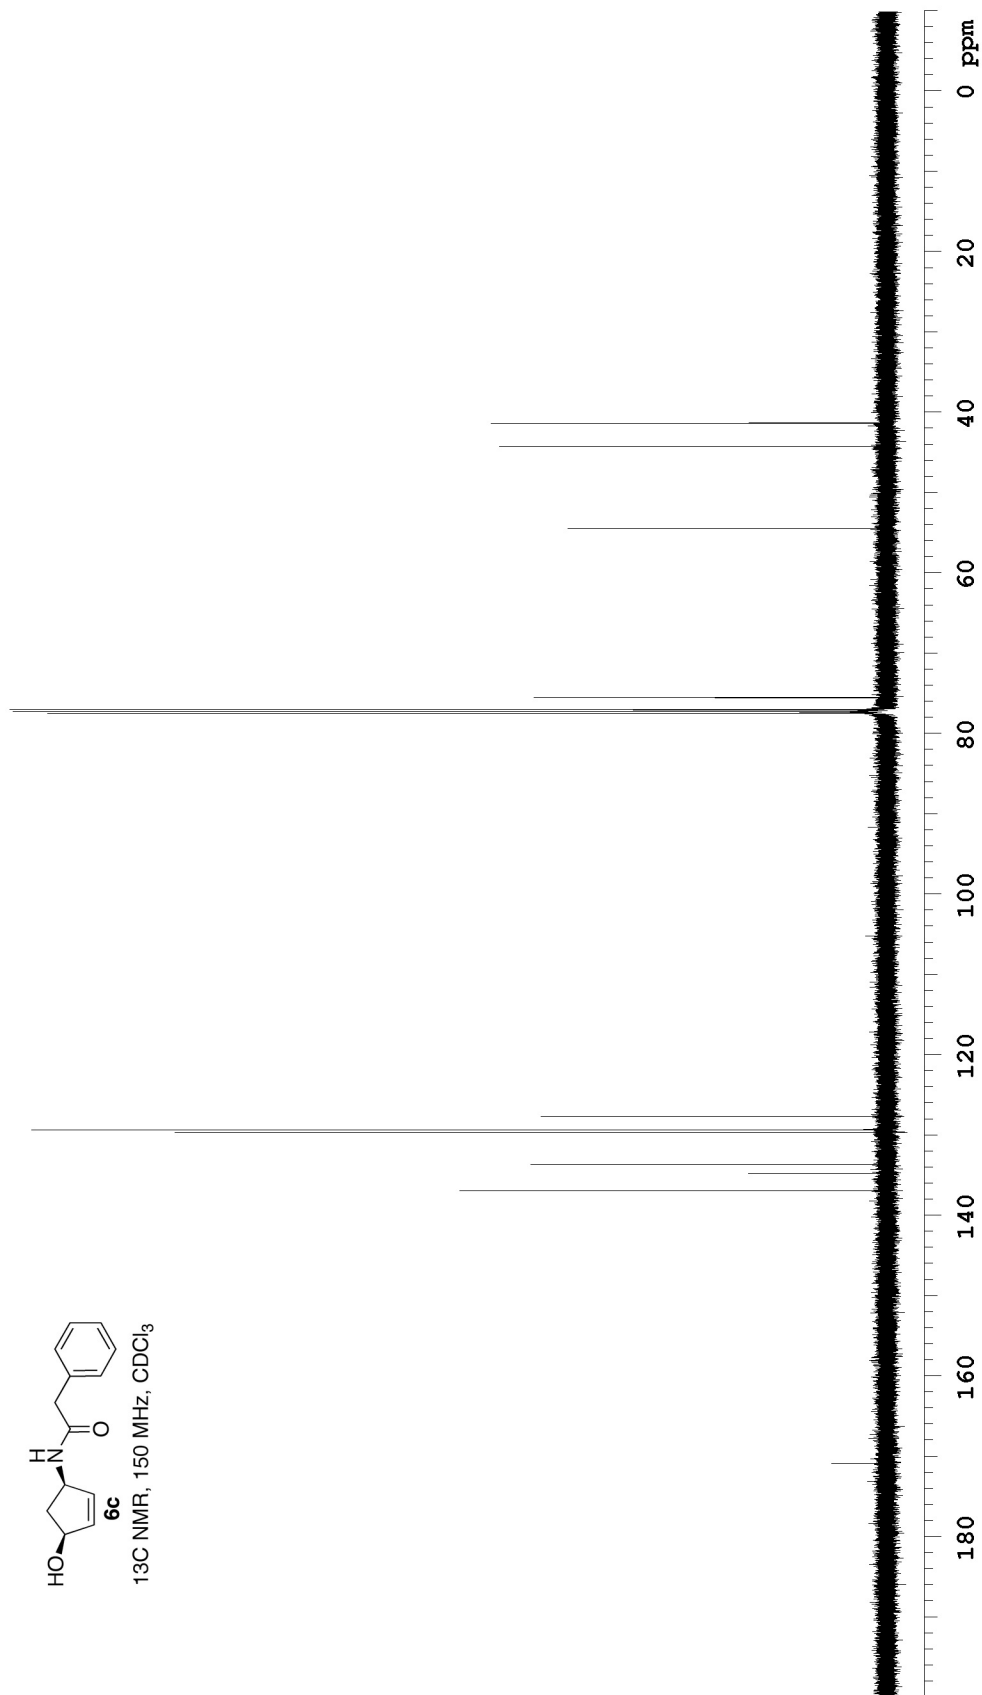

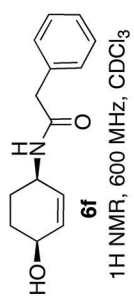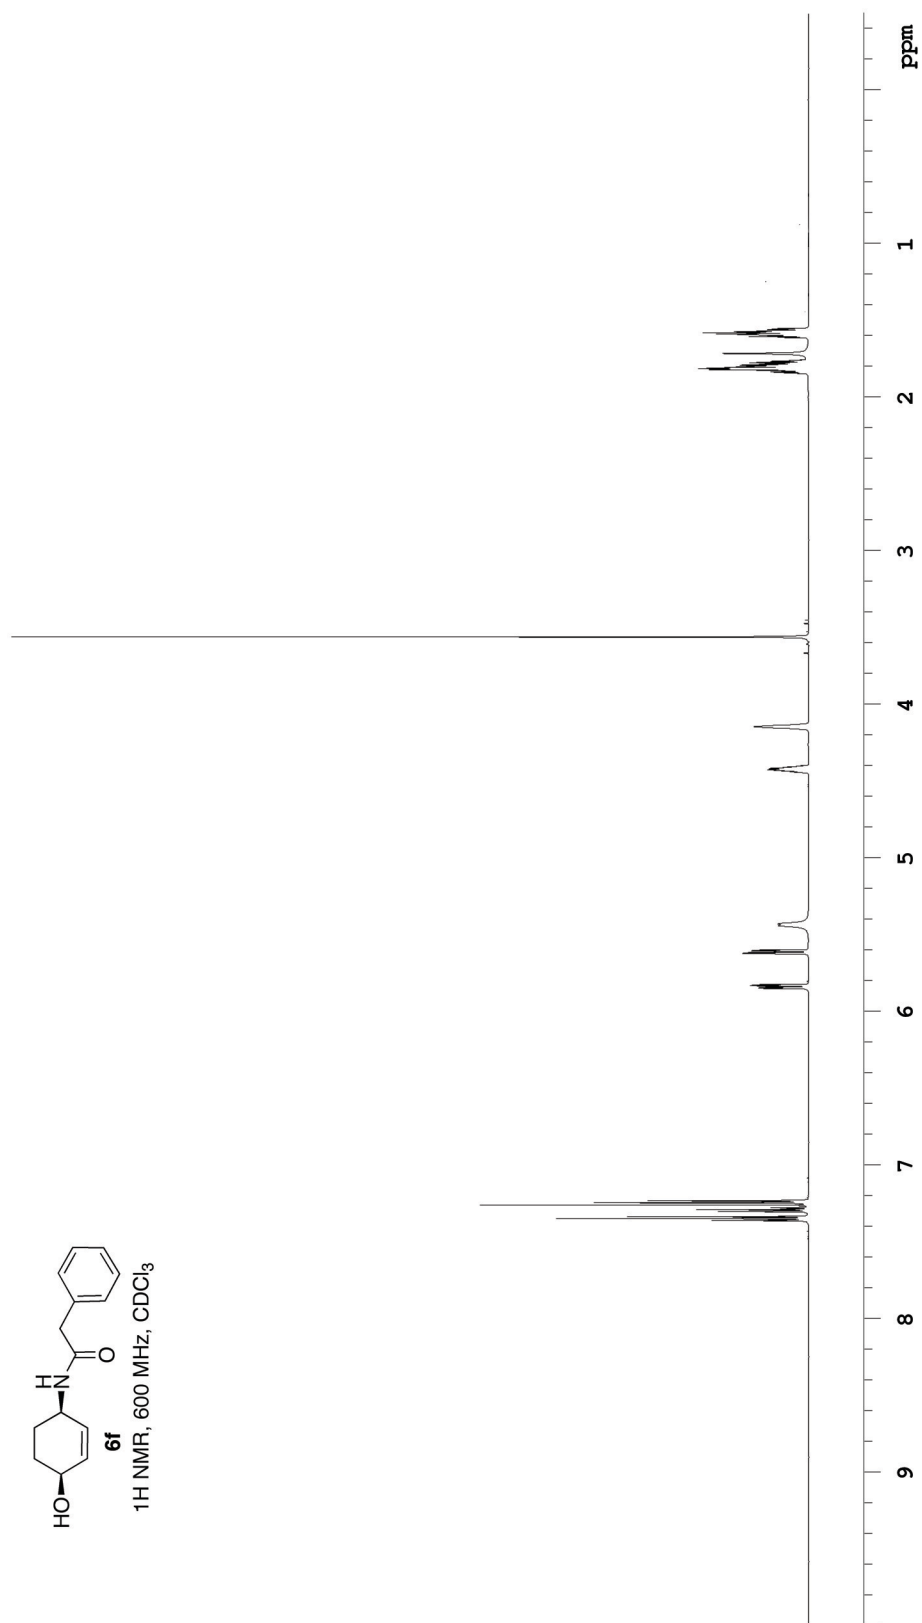

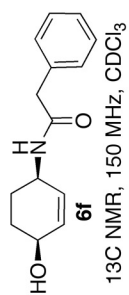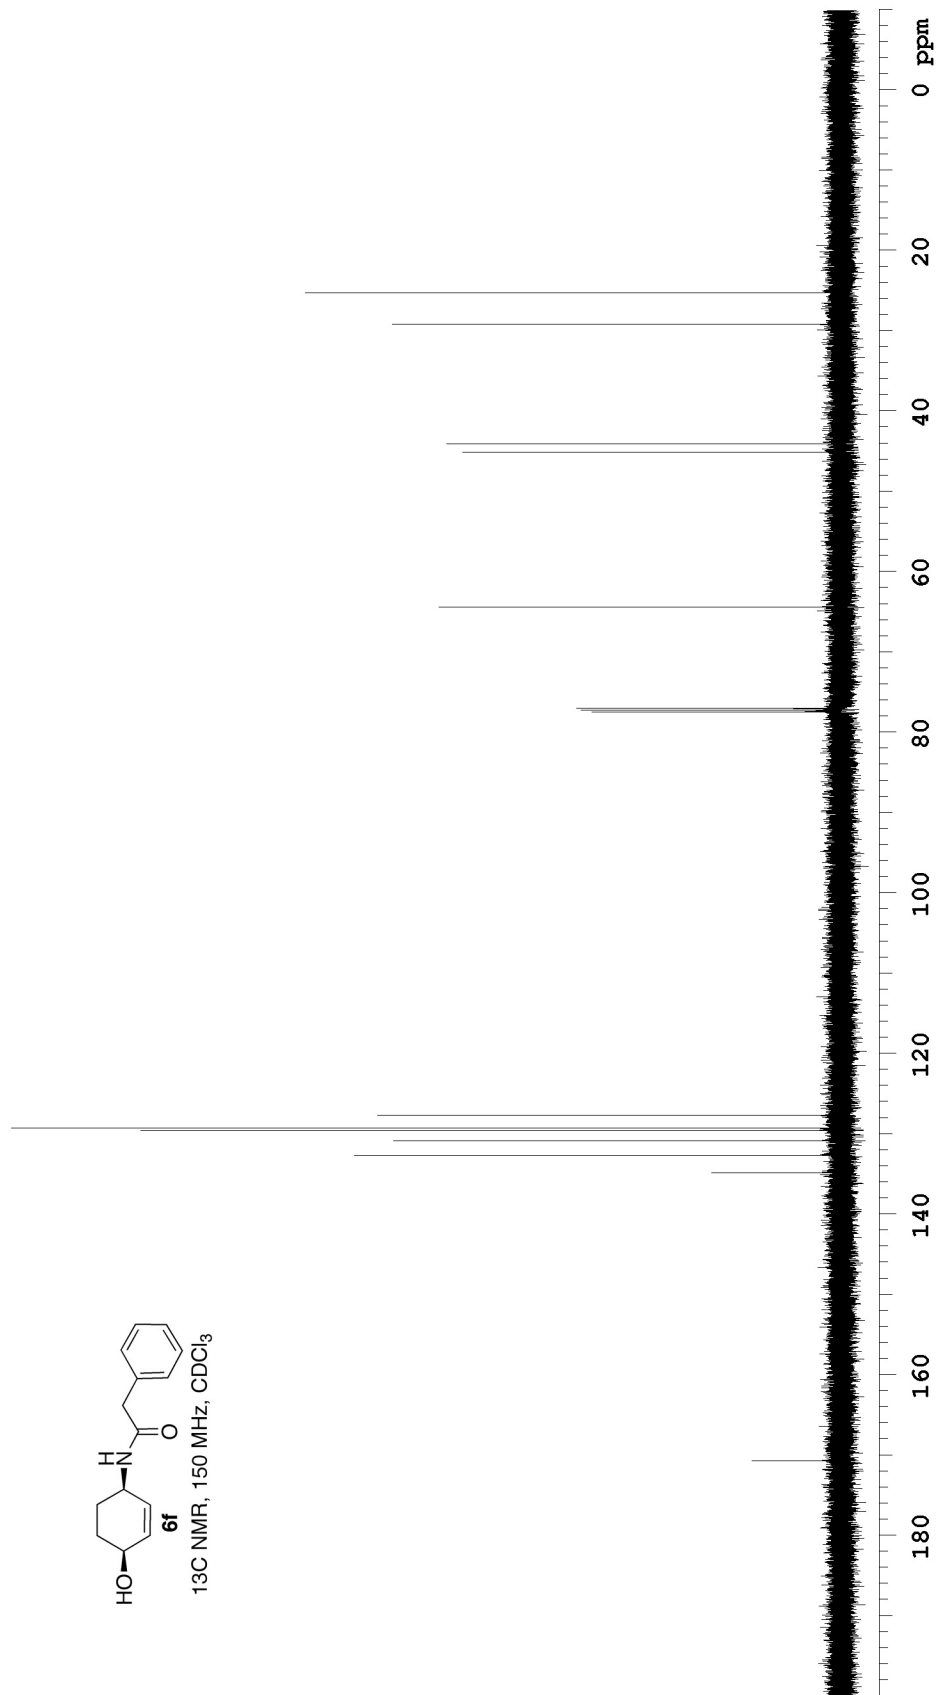

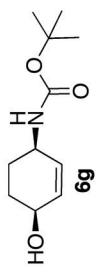

<sup>1</sup>H NMR, 600 MHz, CDCl<sub>3</sub>

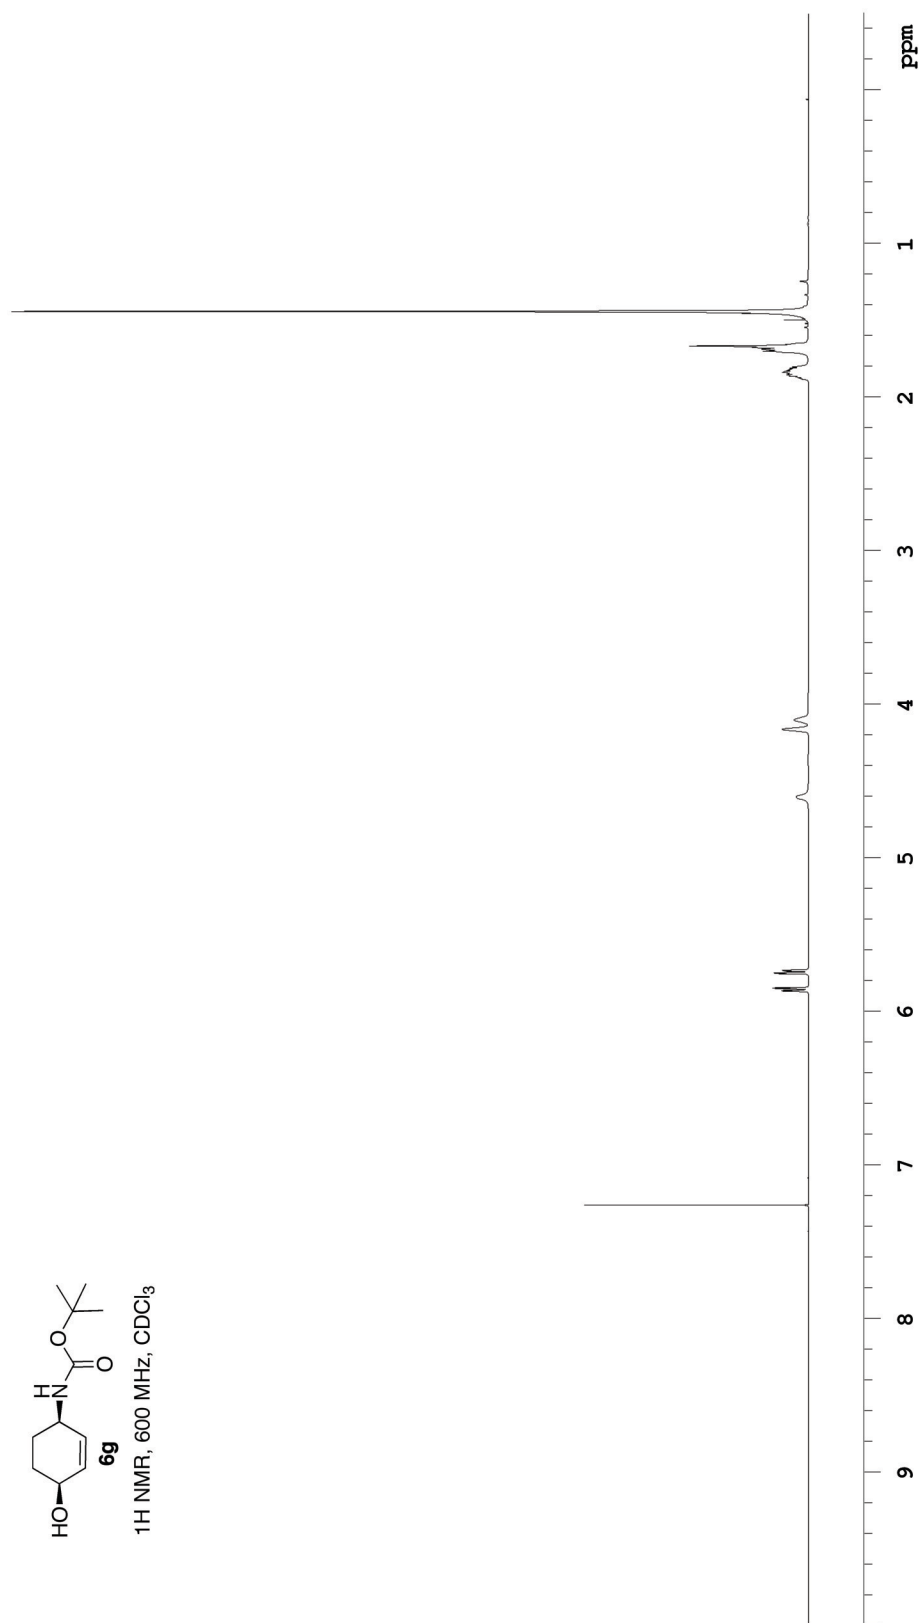

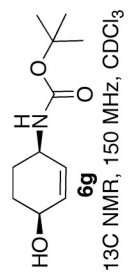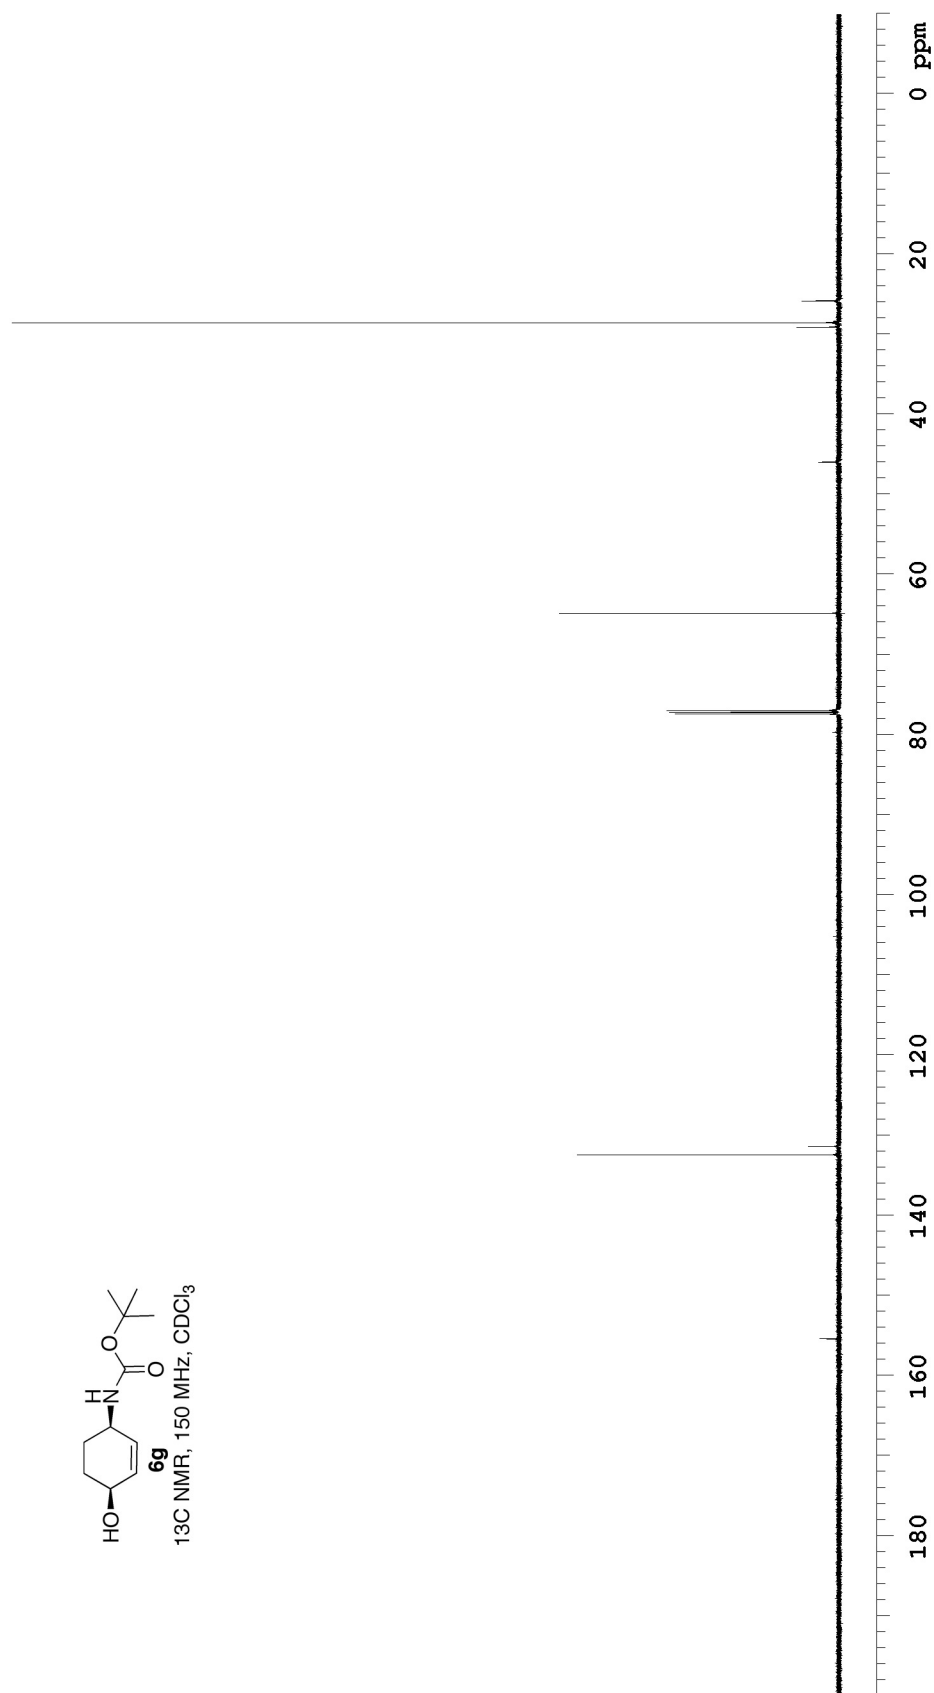

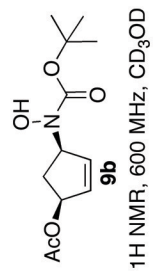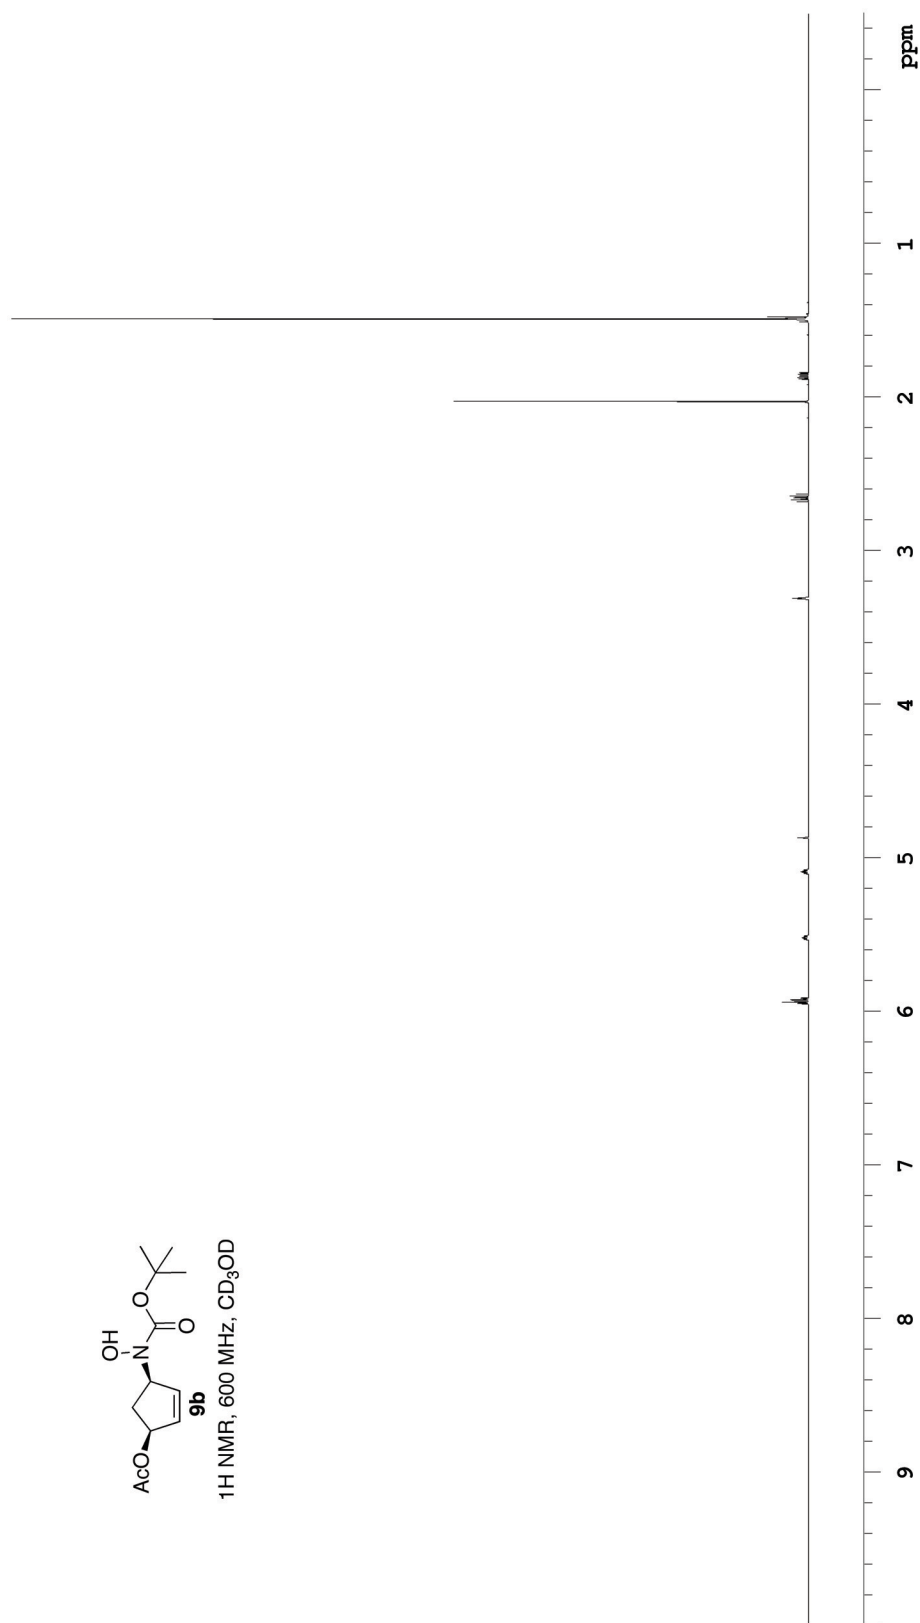

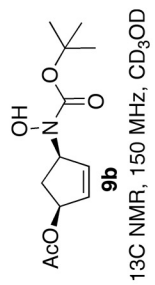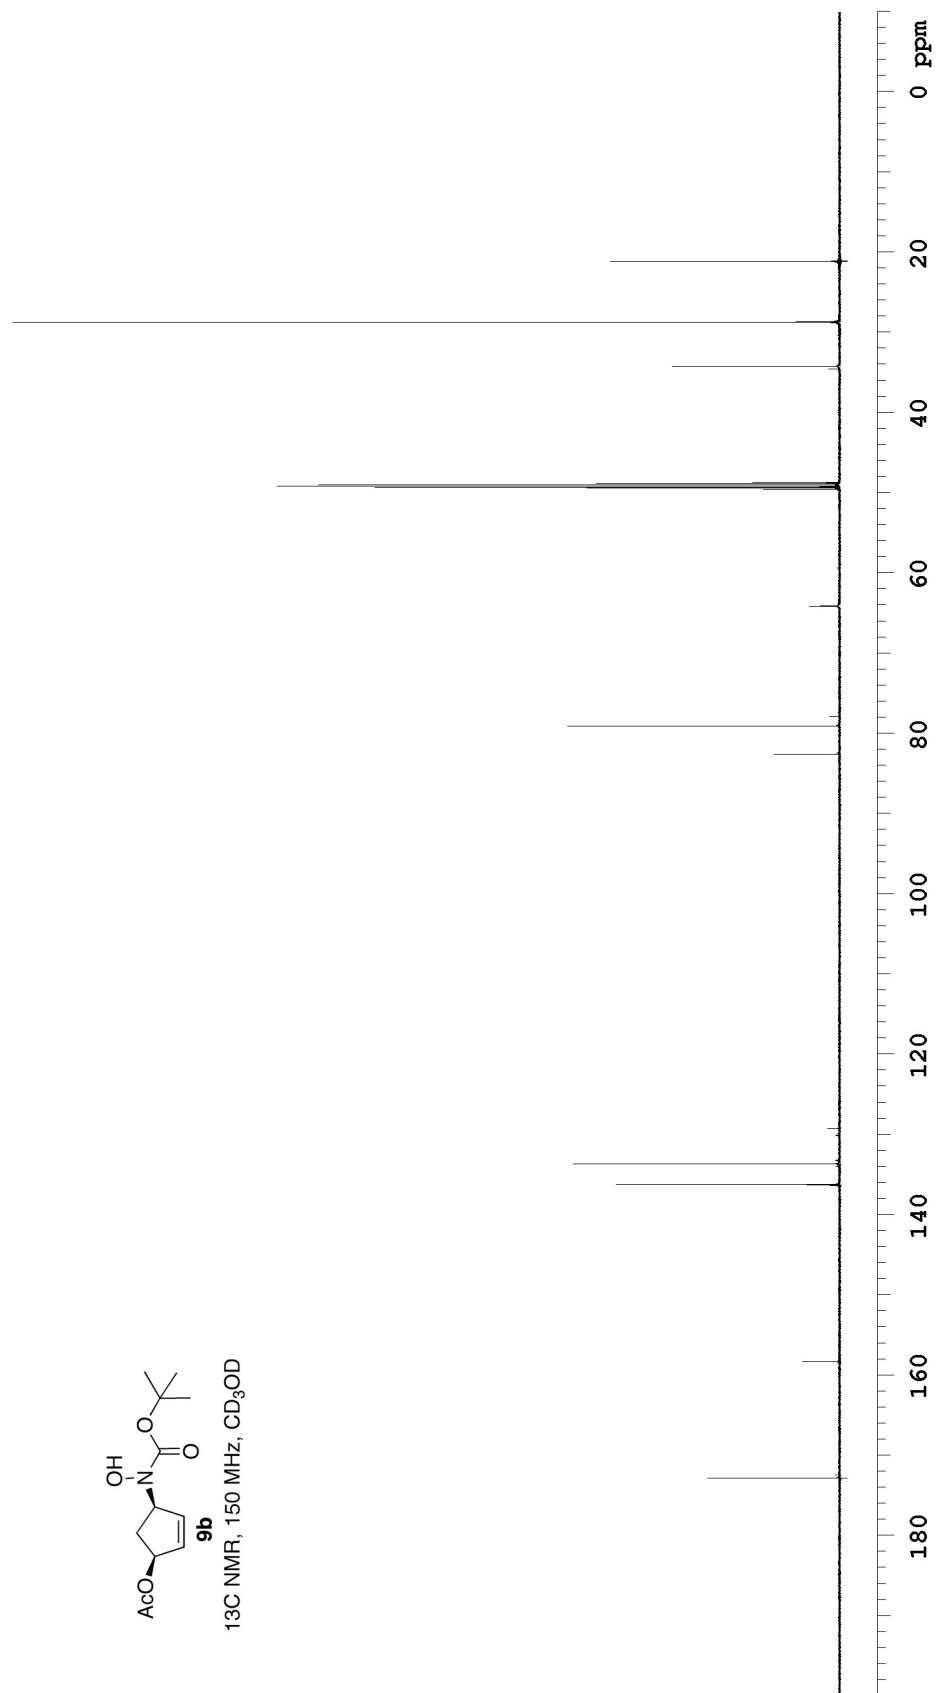



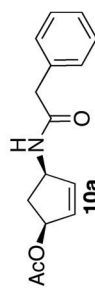

<sup>1</sup>H NMR, 600 MHz, CDCl<sub>3</sub>

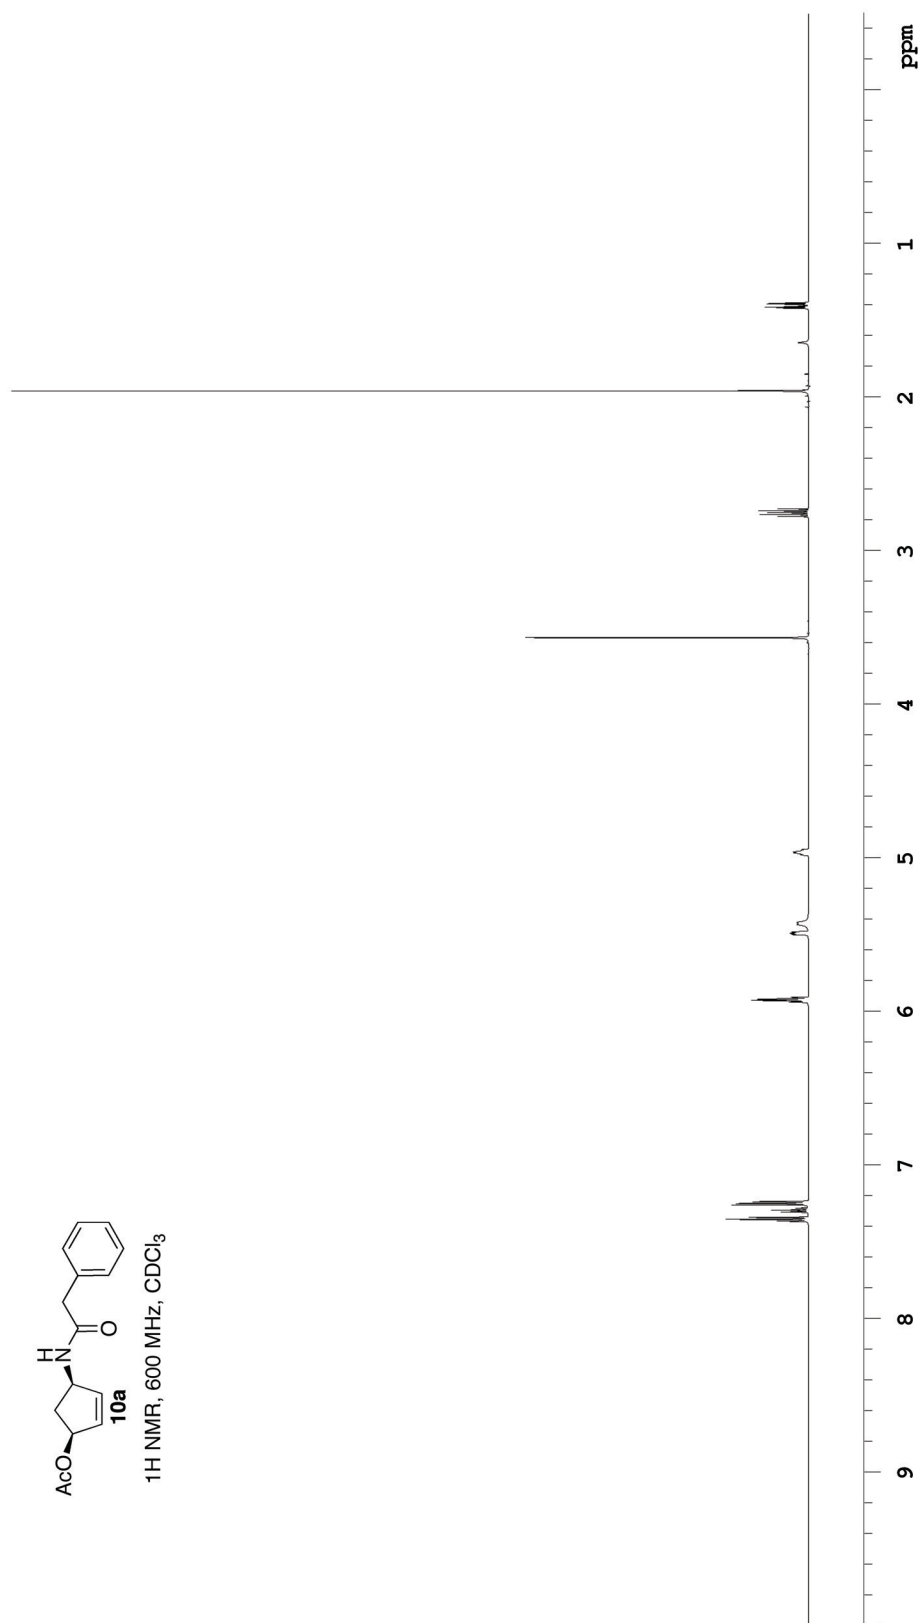

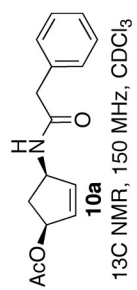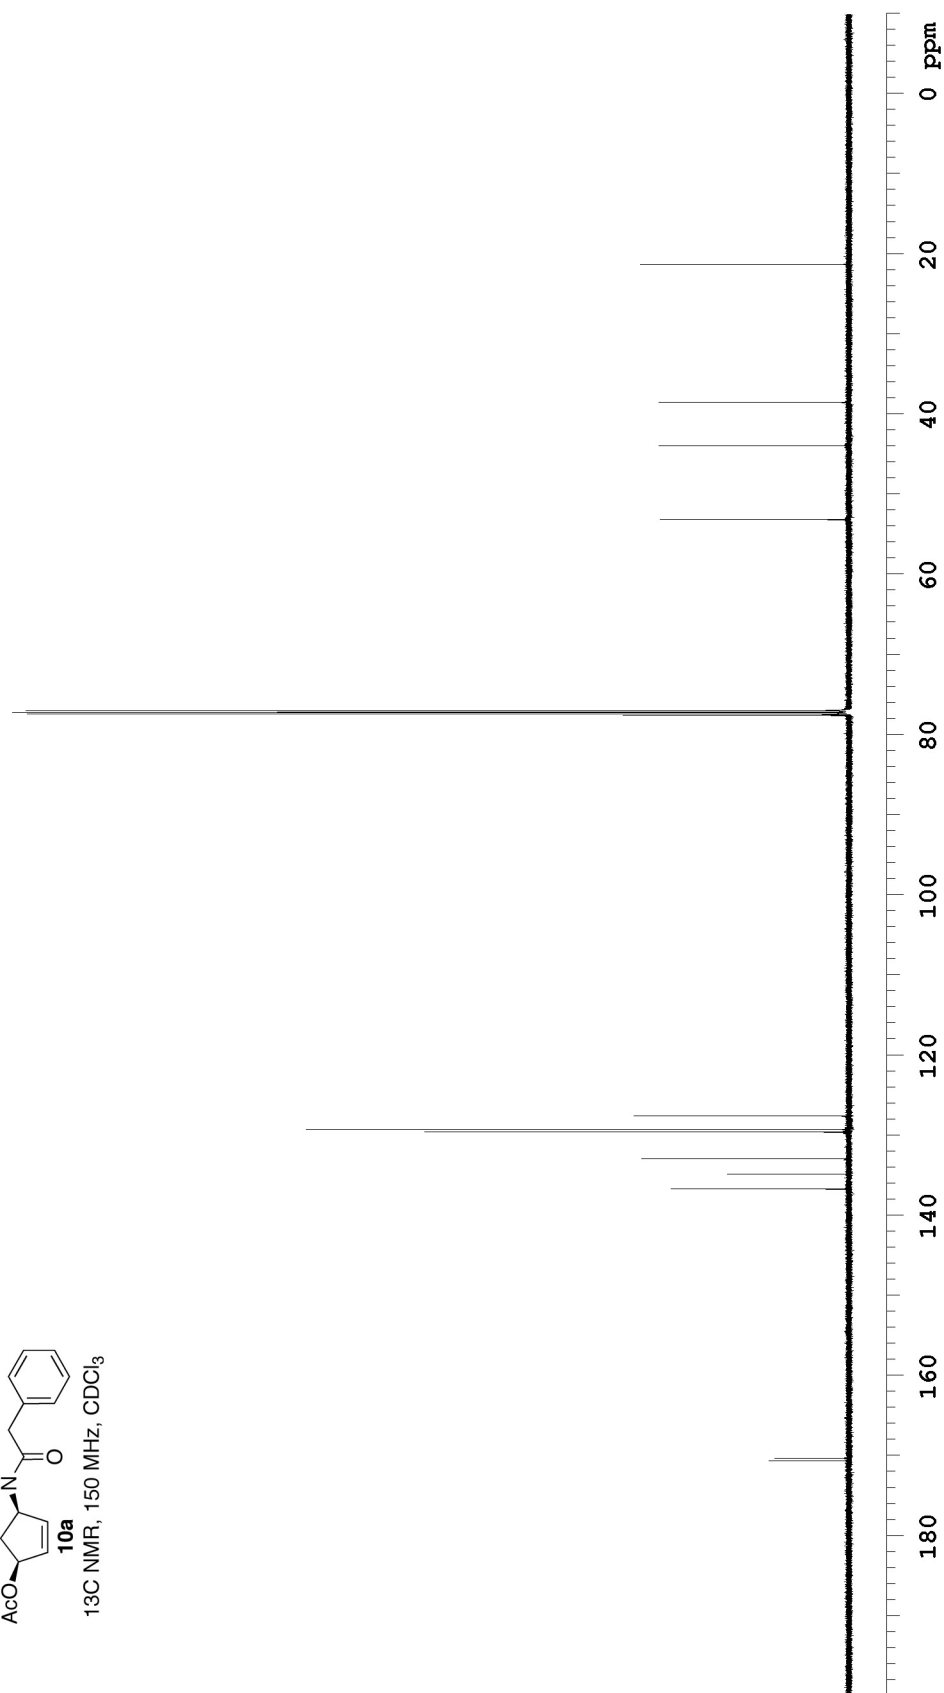

Supplement: Supplementary file 1 [file 4586380]
